# Supplementary material
Source: PubMed Central journal article supplement (PMC4386323)
Supplement: pnas.201424068SI.pdf [file pnas.201424068SI.pdf]

# Supporting Information

Undheim et al. 10.1073/pnas.1424068112

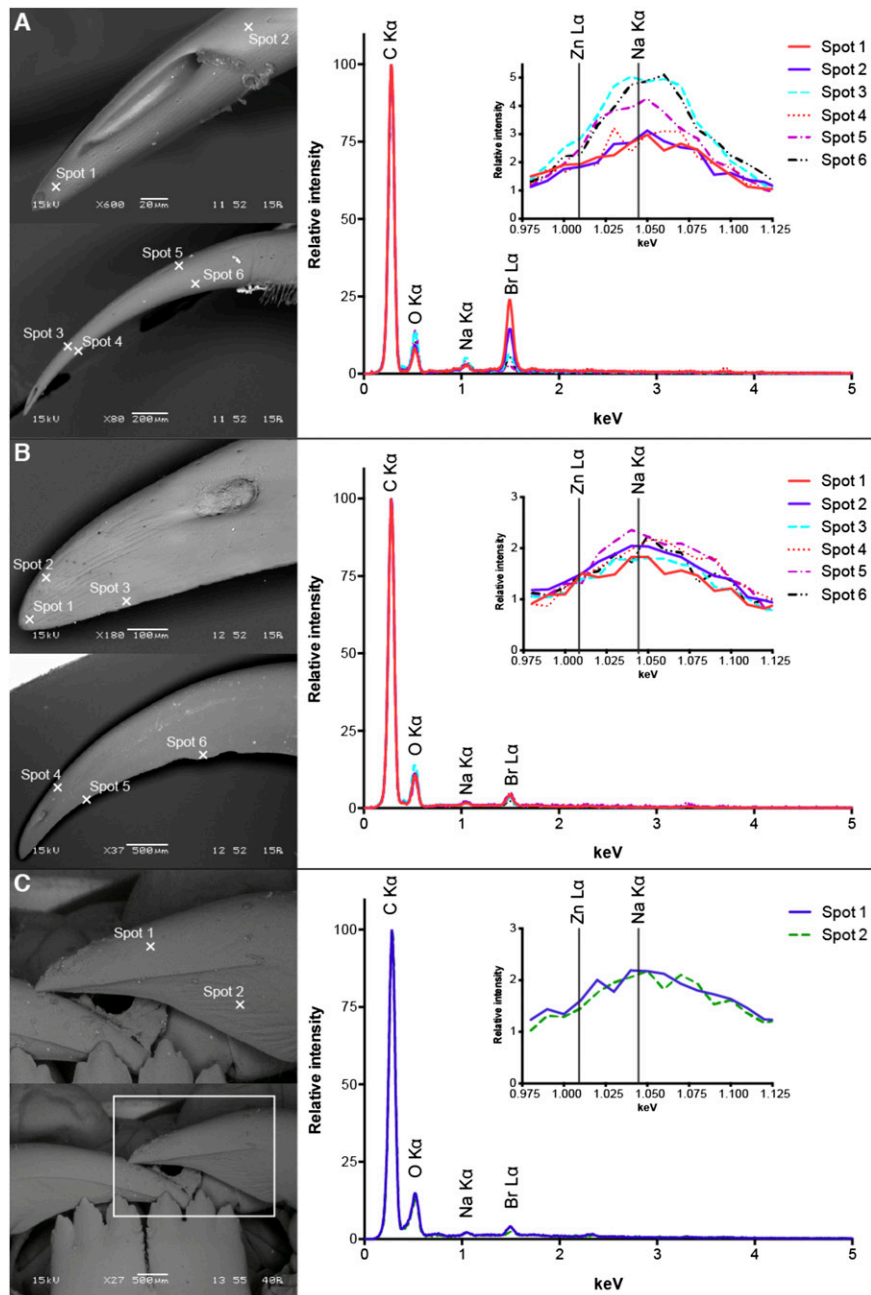

**Fig. S1.** Elemental composition of cuticle from centipede forcipules. Backscattered electron SEM micrographs and EDS spot analyses of cuticle from the forcipule apical claws of (A) *Theruoopoda longicornis*, (B) *Scolopendra morsitans*, and (C) *Ethmostigmus rubripes* showing the apparent lack of incorporated Zn. Spots were analyzed by EDS at 10 kV (A and B) or 15 kV (C). Spots shown in the SEM micrographs are numbered according to their corresponding spectra, and major peaks are labeled according to the corresponding elemental K $\alpha$  (C, O, Na) or L $\alpha$  (Zn and Br). Inset spectra show the region encompassing the near-overlapping L $\alpha$  of Zn and K $\alpha$  of Na (positions indicated by the black lines), highlighting that the peak is indicative of Na not Zn. Variations in peak height are likely influenced by sample topography and do not represent quantitative differences. The white box indicates the region of the *E. rubripes* forcipule micrograph that has been magnified and shown as the top image in C.
